# Supplementary material
Source: MDPI journal article supplement (https://www.mdpi.com/2673-6209/3/2/16)
Supplement: s1 [file s1]

## Supplementary Materials

# Heat-Resistant Polymers with Intense, Visible Photoluminescence Functionality and Fluorescence Probing Application

Masatoshi Hasegawa \* and Shunichi Horii

Department of Chemistry, Faculty of Science, Toho University, 2-2-1 Miyama, Funabashi, Chiba 274-8510, Japan

\* Correspondence: mhasegaw@chem.sci.toho-u.ac.jp

**Table S1.** Commercial sources, drying condition, and melting points of common monomers and fluorophore-containing monofunctional compounds used for the polycondensation of polybenzoxazoles and polyazomethines.

| Monomer or monoaldehyde                                           | Source                        | Vacuum-drying condition | Melting point (°C) <sup>a</sup> |
|-------------------------------------------------------------------|-------------------------------|-------------------------|---------------------------------|
| 4,6-Diaminoresorcinol dihydrochloride (DAR)                       | Tokyo Chemical Industry (TCI) | 30 °C/24 h              | 302/322 <sup>b</sup>            |
| 4,4'-Diamino-3,3'-dihydroxybiphenyl ( <i>p</i> -HAB)              | Wakayama Seika                | 60 °C/12 h              | 300                             |
| 3,3'-Diamino-4,4'-dihydroxybiphenyl ( <i>m</i> -HAB)              | Sumitomo Bakelite             | 60 °C/12 h              | 333                             |
| 3,3'-Diamino-4,4'-dihydroxydiphenylether (ADPE)                   | Nippon Kayaku                 | 60 °C/12 h              | 202                             |
| 2,2-Bis(3-amino-4-hydroxyphenyl)hexafluoropropane (6FAP)          | Central Glass                 | 200 °C/12 h             | 248                             |
| 1,3-Cyclohexanedicarboxylic acid (mixture of isomers) (1,3-CHDCA) | Aldrich                       | 100 °C/24 h             | 119                             |
| 1,4-Cyclohexanedicarboxylic acid (mixture of isomers) (1,4-CHDCA) | TCI                           | 120 °C/24 h             | 312/346 <sup>b</sup>            |
| 4,4'-Oxybisbenzoic acid (OBA)                                     | TCI                           | 100 °C/24 h             | 315                             |
| 2,2-Bis(4-aminophenyl)hexafluoropropane (Bis-B-AF)                | Central Glass                 | 50 °C/12 h              | 198 <sup>c</sup>                |
| Terephthalaldehyde (TPAL)                                         | TCI                           | 40 °C/24 h <sup>d</sup> | 115                             |
| 2,2-Bis[4-(4-aminophenoxy)phenyl]hexafluoropropane (HFBAPP)       | Wakayama Seika                | 50 °C/24 h              | 159                             |
| 1-Pyrenecarboxaldehyde (1-PYAL)                                   | TCI                           | -                       | 128 <sup>c</sup>                |
| 9-Anthracenecarboxaldehyde (9-AAL)                                | TCI                           | -                       | 107 <sup>c</sup>                |

<sup>a</sup> Data determined from the endothermic peak measured at a heating rate of 5 °C min<sup>-1</sup> on DSC.

<sup>b</sup> Double endothermic peak in the DSC thermogram.

<sup>c</sup> Data from safety data sheet.

<sup>d</sup> Prior to vacuum-drying, the monomer was recrystallized from water.

**Table S2.** Commercial sources, drying condition, and melting points of common monomers and fluorophore-containing monofunctional compounds used for the polyaddition of polyimide precursors.

| Monomer or monoamine                                               | Source                   | Vacuum-drying condition  | Melting point (°C) <sup>a</sup> |
|--------------------------------------------------------------------|--------------------------|--------------------------|---------------------------------|
| 1,2,3,4-Cyclobutanetetracarboxylic dianhydride (CBDA)              | Nissan Chemical          | 160 °C/12 h              | 241                             |
| Pyromellitic dianhydride (PMDA)                                    | TCI                      | 150 °C/12 h              | 287                             |
| 3,3',4,4'-Biphenyltetracarboxylic dianhydride ( <i>s</i> -BPDA)    | TCI                      | 200 °C/12 h              | 300                             |
| 2,3',3,4'-Biphenyltetracarboxylic dianhydride ( <i>a</i> -BPDA)    | Ube Industries           | 200 °C/12 h              | 199                             |
| 2,2',3,3'-Biphenyltetracarboxylic dianhydride ( <i>i</i> -BPDA)    | JSR                      | 200 °C/12 h              | 272                             |
| Hydroquinone diphthalic anhydride (HQDA)                           | Chriskev Company         | 150 °C/12 h              | 267                             |
| 1,4,5,8-Naphthalenetetracarboxylic dianhydride (1,4,5,8-NTDA)      | Aldrich                  | 180 °C/12 h              | 451                             |
| 2,3,6,7-Naphthalenetetracarboxylic dianhydride (2,3,6,7-NTDA)      | JFE Chemical             | 180 °C/12 h              | 360                             |
| 3,3'',4,4''- <i>p</i> -Terphenyltetracarboxylic dianhydride (TPDA) | Hitachi Chemical         | 200 °C/12 h              | 317                             |
| 9,10-Bis(4-aminophenyl)anthracene (BAPA)                           | -                        | 100 °C/24 h <sup>b</sup> | 323                             |
| HTA-44BP                                                           | -                        | 160 °C/24 h <sup>c</sup> | 254                             |
| 4,4'-Methylenebis(cyclohexylamine) (MBCHA)                         | New Japan Chemical       |                          |                                 |
| 4,4'-Methylenebis(2-methylcyclohexylamine) (M-MBCHA)               | Aldrich                  |                          |                                 |
| <i>Trans</i> -1,4-cyclohexanediamine ( <i>t</i> -CHDA)             | Iwatani Industrial Gases | 30 °C/12 h               | 70                              |
| 2,2'-Bis(trifluoromethyl)benzidine (TFMB)                          | Wakayama Seika           | 50 °C/12 h               | 184                             |
| <i>p</i> -Phenylenediamine ( <i>p</i> -PDA)                        | Wako Chemical            | 50 °C/12 h               | 142                             |
| 1-Aminopyrene (1-APY)                                              | TCI                      |                          | 117                             |
| 1-Aminoanthracene (1-AAN)                                          | TCI                      |                          | 122                             |
| 2-Aminoanthracene (2-AAN)                                          | TCI                      |                          | 242                             |

<sup>a</sup> Data determined from the endothermic peak measured at a heating rate of 5 °C min<sup>-1</sup> on DSC.

<sup>b</sup> Prior to vacuum-drying, the monomer was recrystallized from benzene.

<sup>c</sup> Prior to vacuum-drying, the monomer was recrystallized from 1,4-dioxane.

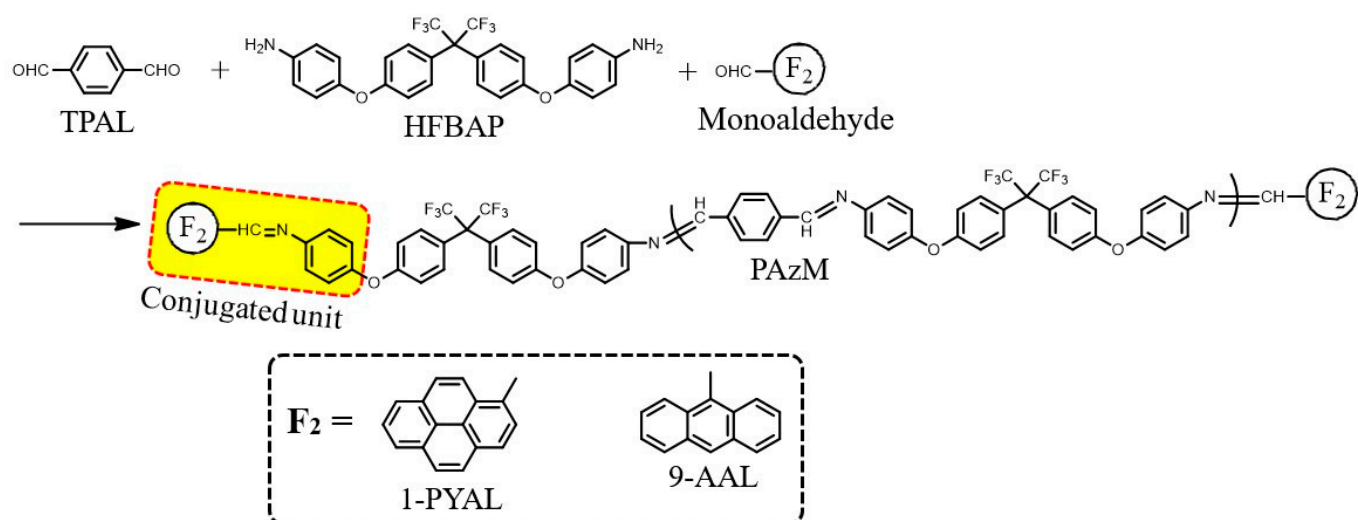

**Figure S1.** Structures of the polyazomethines (PAzM) terminated with conjugated monoaldehydes.
